# Supplementary material for: Changes in an enzyme ensemble during catalysis observed by high-resolution XFEL crystallography
Source: PubMed Central journal article supplement (PMC10971408; doi:10.1126/sciadv.adk7201), 2024-03-27
Supplement: sciadv.adk7201_sm.pdf [file sciadv.adk7201_sm.pdf]

Supplementary Materials for  
**Changes in an enzyme ensemble during catalysis observed by high-resolution  
XFEL crystallography**

Nathan Smith *et al.*

Corresponding author: Mark A. Wilson, [mwilson13@unl.edu](mailto:mwilson13@unl.edu)

*Sci. Adv.* **10**, eadk7201 (2024)  
DOI: 10.1126/sciadv.adk7201

**This PDF file includes:**

Figs. S1 to S11  
Tables S1 to S3

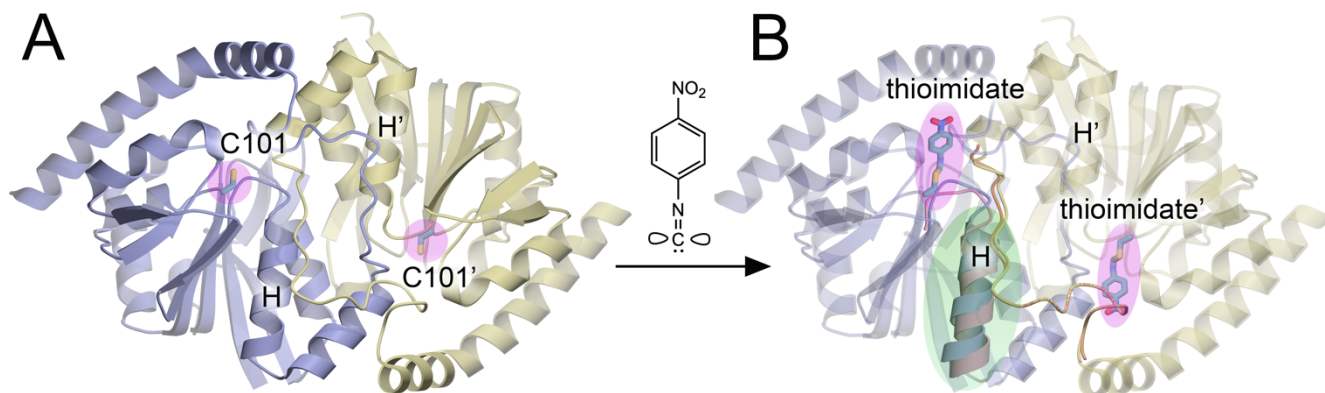

**Fig. S1. Schematic of wild-type ICH catalysis-activated motions.** (A) Wild-type ICH is shown in ribbon cartoon with the active site highlighted in pink. (B) Upon formation of the thioimide intermediate, changes in active site hydrogen bonds allow sampling of a shifted conformation of helix H (green highlight).

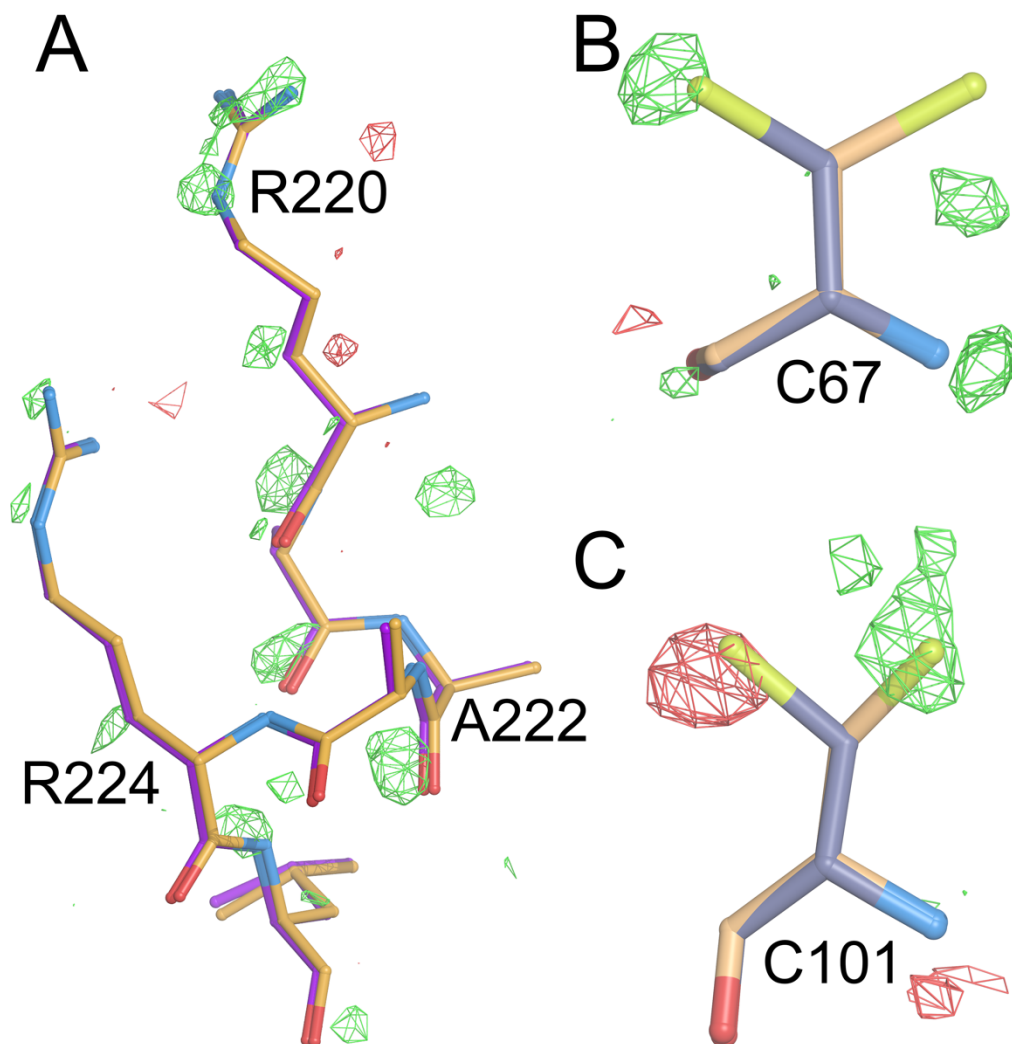

**Fig. S2. Examples of temperature-dependent differences in G150T ICH.**  $F_o(274\text{ K synchrotron}) - F_o(298\text{ K XFEL})$  isomorphous difference electron density maps at  $1.3\text{ \AA}$  resolution are contoured at  $3\sigma$ , with positive features in green and negative ones in red. (A) Difference electron density peaks in these residues agree with the small shifts observed when a  $100\text{ K}$  cryogenic structure (purple bonds) is superimposed on the  $298\text{ K}$  XFEL structure (gold bonds). (B) The populations of C67 alternate conformations are altered by the change in temperature between the synchrotron and XFEL datasets, as shown by difference electron density peaks near the sulfur atom (yellow). (C) The populations of alternate conformations of C101 are altered by change in temperature, as shown by peaks near the sulfur atom (yellow).

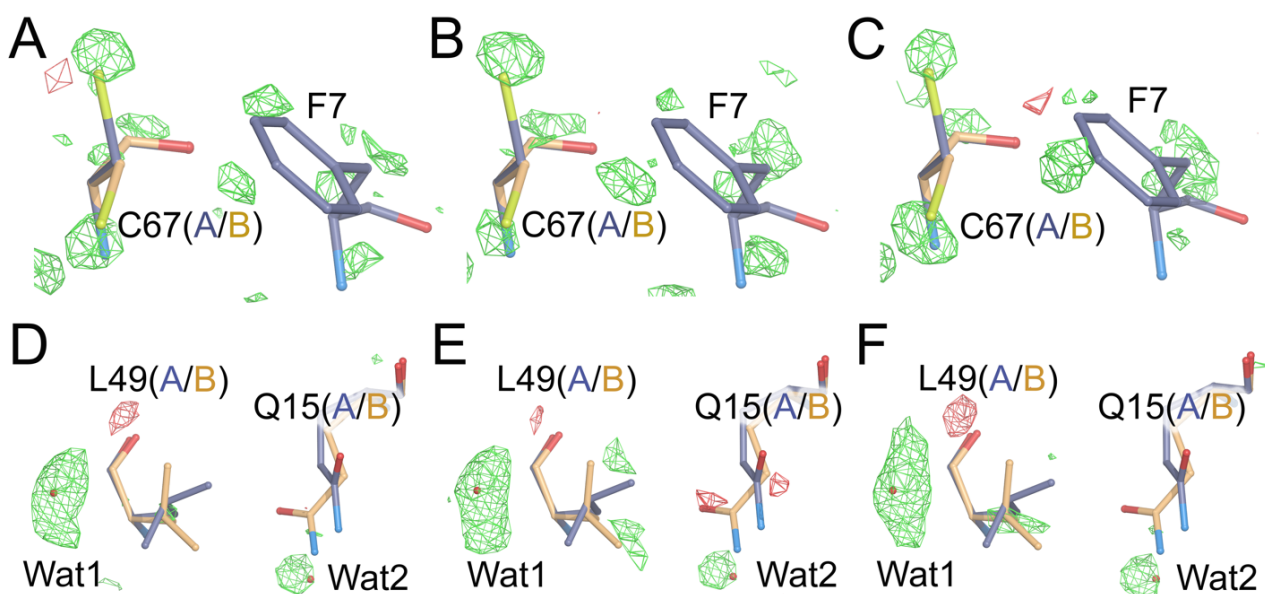

**Fig. S3. Difference electron density features between synchrotron and XFEL datasets are reproducible.**  $F_o(274\text{ K synchrotron})-F_o(298\text{ K XFEL})$  isomorphous difference electron density maps at  $1.3\text{ \AA}$  resolution are contoured at  $2.8-3\sigma$  (corresponding to  $0.17-0.18\text{ e}^-/\text{\AA}^3$ ) with positive features in green and negative ones in red. (A-C) show the same region near C67 with  $F_o(274\text{ K synchrotron})-F_o(298\text{ K XFEL})$  isomorphous difference electron density maps calculated from three independent synchrotron datasets. (D-F) show the region near L49 with  $F_o(274\text{ K synchrotron})-F_o(298\text{ K XFEL})$  isomorphous difference electron density maps calculated from three independent synchrotron datasets. The difference electron density features agree closely between the three datasets.

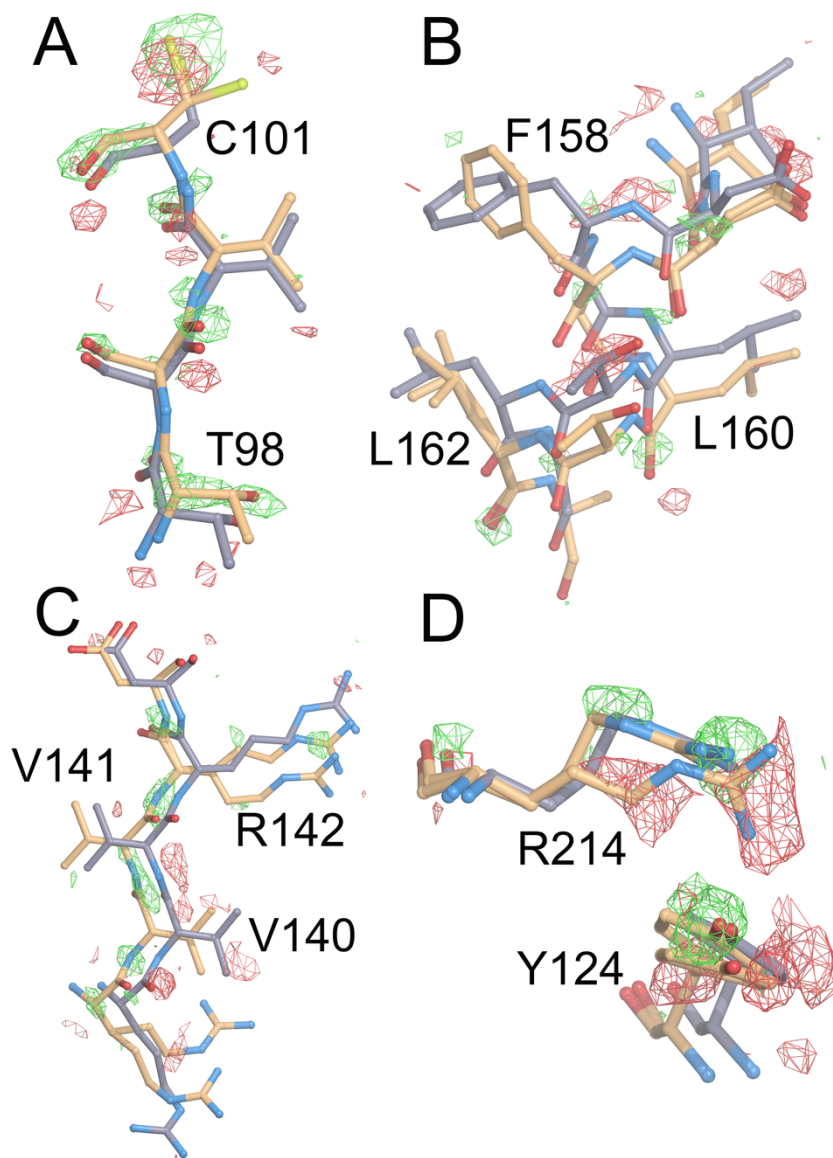

**Fig. S4. The G150T mutation causes ICH to populate conformations that the wild-type enzyme samples during catalysis.**  $F_o(15s)-F_o(0s)$  isomorphous difference electron density maps calculated for wild-type ICH from a prior experiment (33) at 1.55 Å resolution are contoured at  $2.7\sigma$  (corresponding to  $0.15 \text{ e}^-/\text{\AA}^3$ ). Wild-type ICH is shown in slate gray and G150T ICH is shown in gold bonds. (A-D) Selected examples where the conformational shifts evident between the wild-type and G150T ICH structures agree well with the difference electron density map peaks observed during catalysis in wild-type ICH. In all panels, the G150T ICH structure (gold) overlaps with positive difference electron density peaks.

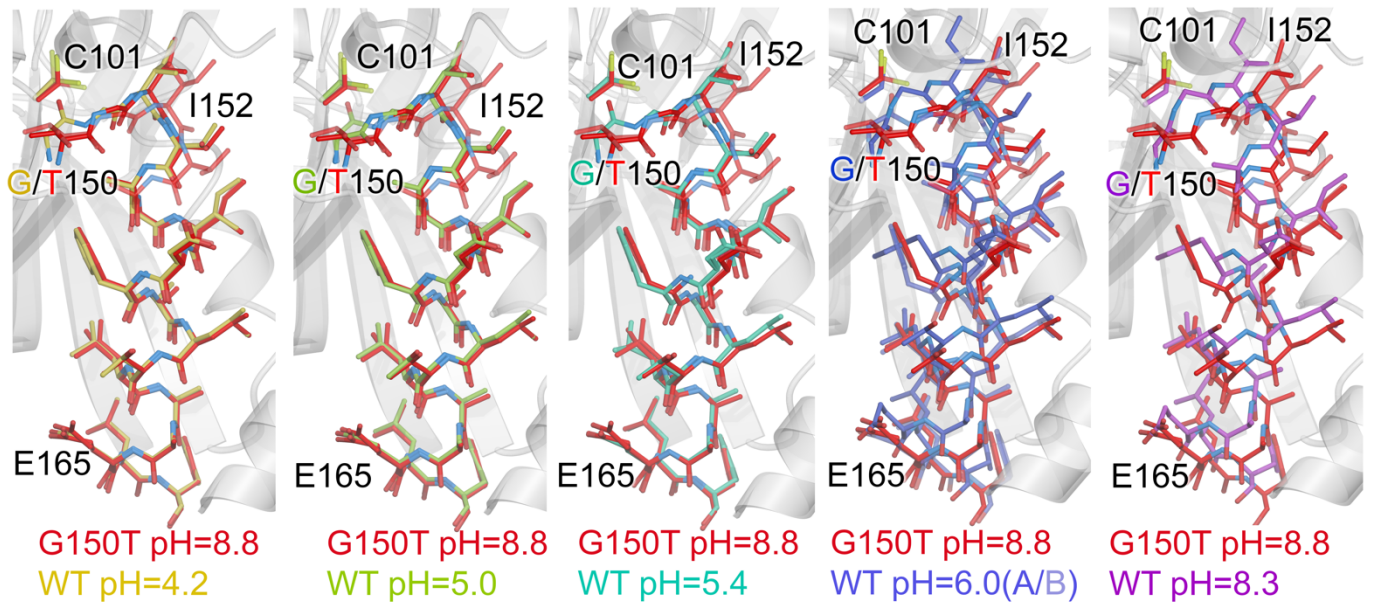

**Fig. S5. pH-dependent shifts of the helix H conformation in wild-type ICH recapitulate changes resulting from the G150T mutation.** The structure of G150T ICH is shown in red bonds and structures of wild-type (WT) ICH at the indicated pH values are shown in bonds ranging from yellow (pH=4.2) to purple (pH=8.3). As pH decreases, wild-type ICH adopts a conformation that is highly similar to G150T ICH, consistent with changes expected from protonation of C101.

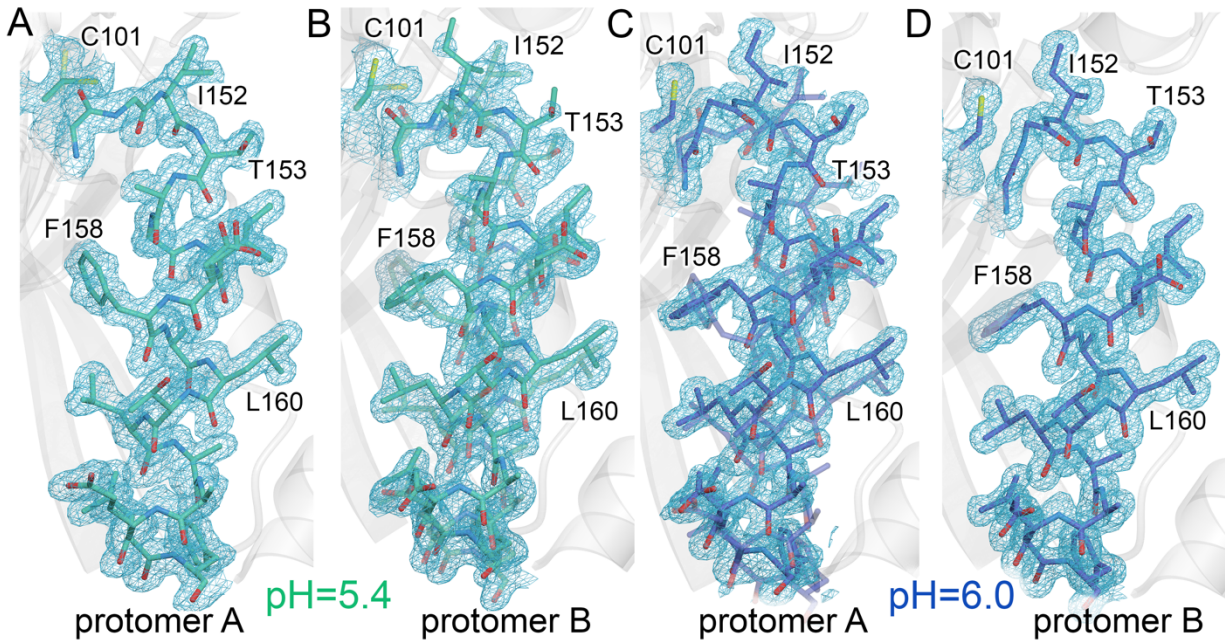

**Fig. S6. pH-dependent conformational heterogeneity in helix H is asymmetric in the wild-type ICH dimer.**  $2mF_o-DF_c$  electron density is shown contoured at  $0.9\sigma$  for wild-type ICH at pH=5.4 (1.33 Å resolution, green; A, B) and pH=6.0 (1.2 Å resolution, blue; C, D). The dominant conformer is shown in solid bonds and the minor conformer is semi-transparent. (A,B) At pH=5.4, protomer A is in the fully shifted conformation and protomer B is a mixture of shifted and strained helix conformations. (C,D) At pH=6.0, protomer A is a mixture of shifted and strained helix conformations and protomer B is in the fully strained conformation. In general, the helix in protomer A has a stronger tendency to sample the shifted (G150T-like) conformation.

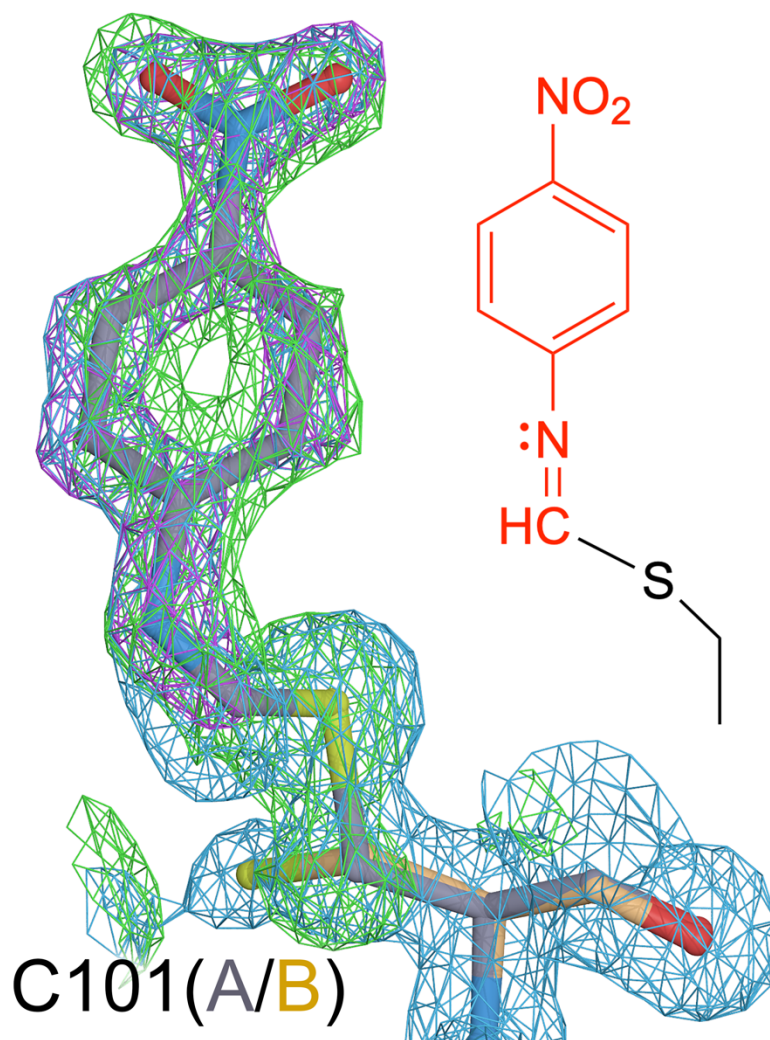

**Fig. S7. Thioimidate intermediate forms in G150T ICH 30 seconds after mixing with p-nitrophenyl isocyanide (p-NPIC) substrate.** The 1.3 Å resolution  $F_o(30s)-F_o(0s)$  isomorphous difference electron density map ( $2.5\sigma$ , green),  $mF_o-DF_c$  omit difference electron density map calculated before the model of the p-nitrophenyl thioimidate was included ( $3.0\sigma$ , purple), and the  $2mF_o-DF_c$  omit electron density map calculated before the model of the thioimidate was included ( $0.8\sigma$ , blue) all show clear evidence for the covalent modification of C101. The chemical structure of the intermediate is shown to the right.



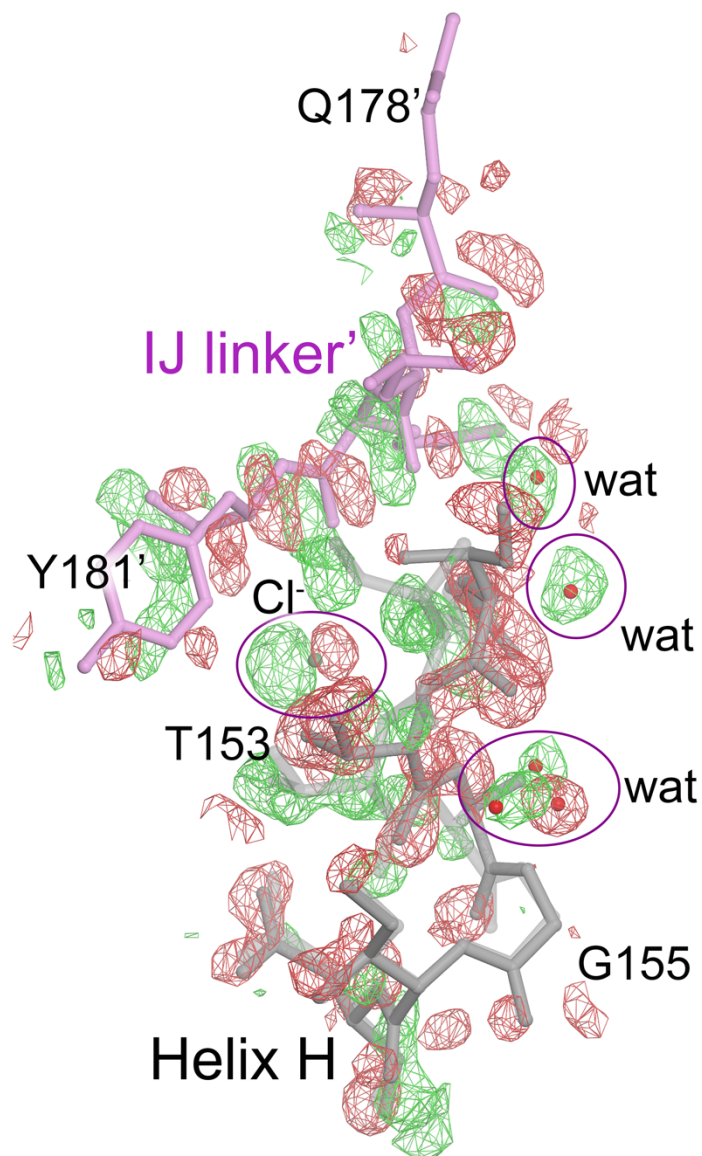

**Fig. S8. Correlated changes in protein and solvent during catalysis in G150T ICH.** The 1.3 Å resolution  $F_o(30s)-F_o(0s)$  isomorphous difference electron density map is contoured at  $3.0\sigma$  with positive features in green and negative ones in red. Helix H, the IJ linker region from the other protomer (purple, indicated with apostrophe), and surrounding solvent (red spheres, labeled “wat”) all display spatially correlated changes in conformation upon intermediate formation during catalysis.

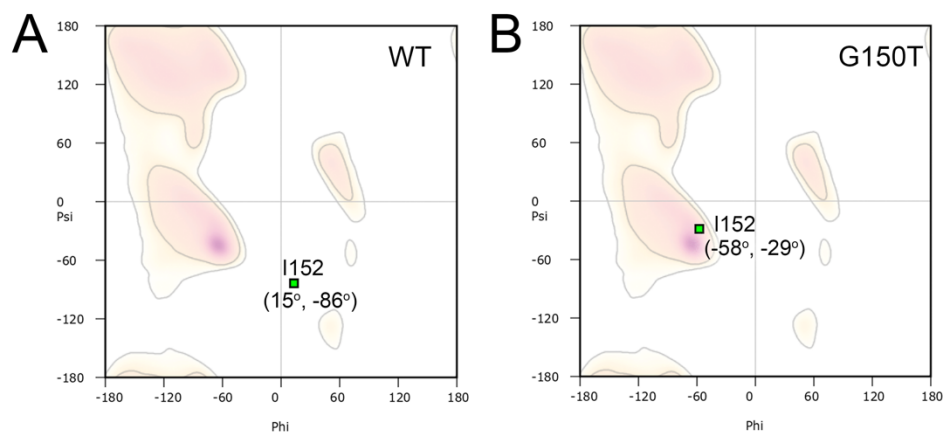

**Fig. S9. Ramachandran plot of I152 in wild-type (WT) and G150T ICH.** (A) I152 backbone torsions are in a forbidden region of the Ramachandran plot in wild-type ICH (green dot, phi and psi torsion values labeled). This residue is modeled into high-quality electron density and thus the backbone geometry of this residue is not a modelling error. (B) The G150T mutation causes a shift of I152 backbone torsions into the favored region of Ramachandran plot, relieving backbone strain and shifting the position of helix H, which is C-terminal to I152.

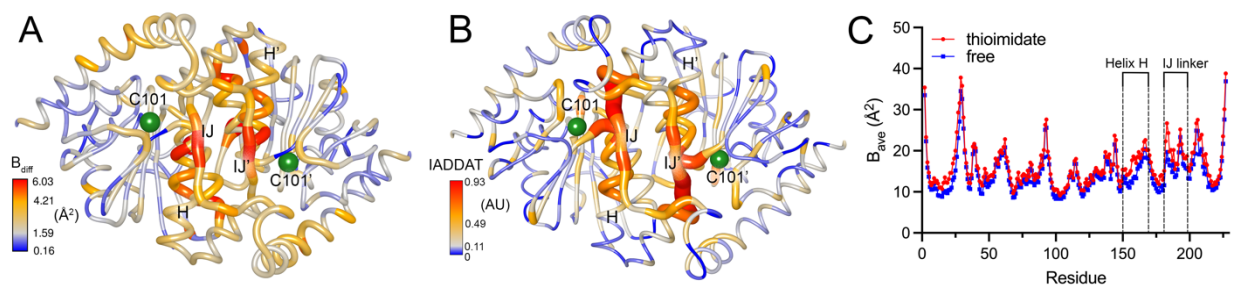

**Fig. S10. Isomorphous difference map features during catalysis are localized and overlap with areas of elevated ADPs.** (A) Difference ADP values between the thioimide structure and the free enzyme ( $B_{\text{diff}}=B_{30\text{s}}-B_{0\text{s}}$ ) are shown, with scale indicated at the lower left. The IJ linker and helix H ADPs are notably elevated upon thioimide formation. (B) The  $F_o(30\text{s})-F_o(0\text{s})$  difference map features were integrated at the absolute difference density above a noise threshold (IADDAT). The threshold was  $3\sigma$  (corresponding to  $0.17 \text{ e}^-/\text{\AA}^3$ ) within  $2.5 \text{ \AA}$  of the model, which was averaged per residue and mapped onto the dimer. The high IADDAT values in helix H and the IJ linker agree with the pattern of elevated ADPs in (A). (C) Residue-averaged main chain values for the ADPs ( $B_{\text{ave}}$ ) are plotted vs. residue number. Helix H and the IJ linker (labeled) have markedly higher average mainchain ADPs upon thioimide formation during G150T ICH catalysis compared to the resting free enzyme, as mapped onto the G150T ICH dimer in (A).

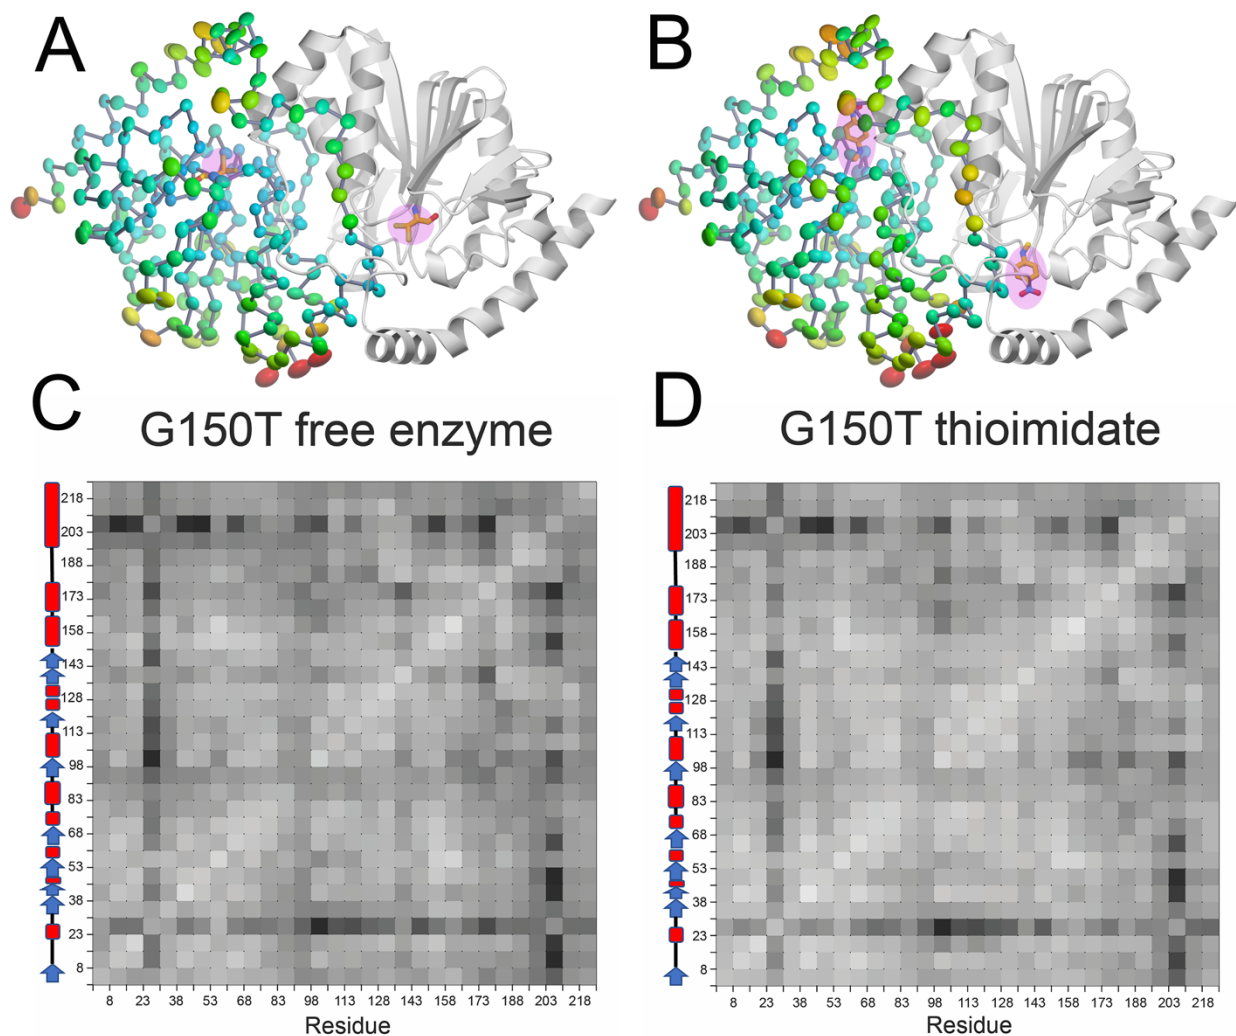

**Fig. S11. Anisotropic ADPs in G150T ICH change in magnitude but not direction upon thioimide formation.** (A,B) Anisotropic ADP ellipsoids for C $\alpha$  atoms at the 85% probability level are colored by magnitude, from blue (5 Å<sup>2</sup>) to red (30 Å<sup>2</sup>). Formation of the thioimide intermediate (labeled; pink highlight) during catalysis elevates ADP magnitudes in the active site, the IJ linker, and helix H. Larger ADP magnitudes are indicated with larger ellipsoid volumes and warmer colors. (C,D) Rosenfield difference analysis (62) indicates no major changes in ADP directional preferences upon intermediate formation. Secondary structural elements in ICH are shown on the left to the Rosenfield matrices, with helices as red rectangles and strands as blue arrows. Rosenfield analysis determines the difference between the projections of two atoms' ADP ellipsoids onto the line joining them. Rigid body-like correlated motion of a pair of atoms would result in low difference values (lighter colors). The Rosenfield matrix is computed by averaging mainchain difference ADP projection values in 30 bins (~7 residues per bin).

**Table S1. Crystallographic data statistics for synchrotron datasets**

| Sample                        | G150T<br>100 K             | G150T-1<br>274K            | G150T-2<br>274K            | G150T-3<br>274K            | WT pH 4.2                  | WT pH 5.0                  | WT pH 5.4                  | WT pH 6.0                  | WT pH 8.3                  |
|-------------------------------|----------------------------|----------------------------|----------------------------|----------------------------|----------------------------|----------------------------|----------------------------|----------------------------|----------------------------|
| Diffraction source            | SSRL<br>12-2               | SSRL<br>12-2               | SSRL<br>12-2               | SSRL<br>12-2               | SSRL<br>9-2                | SSRL<br>9-2                | SSRL<br>9-2                | SSRL<br>9-2                | SSRL<br>9-2                |
| Wavelength (Å)                | 0.775                      | 0.775                      | 0.775                      | 0.775                      | 0.886                      | 0.886                      | 0.886                      | 0.886                      | 0.886                      |
| Temperature (K)               | 100                        | 274                        | 274                        | 274                        | 100                        | 100                        | 100                        | 100                        | 100                        |
| Detector                      | Pilatus 6M                 | Pilatus 6M                 | Pilatus 6M                 | Pilatus 6M                 | Pilatus 6M                 | Pilatus 6M                 | Pilatus 6M                 | Pilatus 6M                 | Pilatus 6M                 |
| Space group                   | P2 <sub>1</sub>            | C2                         | C2                         | C2                         | P2 <sub>1</sub>            | P2 <sub>1</sub>            | P2 <sub>1</sub>            | P2 <sub>1</sub>            | P2 <sub>1</sub>            |
| a, b, c (Å)                   | 55.56,<br>58.65,<br>68.87  | 72.19,<br>59.72,<br>56.30  | 72.20,<br>59.73,<br>56.37  | 72.13,<br>59.66,<br>56.17  | 57.04,<br>40.60,<br>83.28  | 57.05,<br>40.72,<br>83.43  | 56.53,<br>56.79,<br>68.77  | 56.75,<br>56.79,<br>68.41  | 56.87,<br>56.83,<br>68.24  |
| α, β, γ (°)                   | 90.00,<br>110.92,<br>90.00 | 90.00,<br>115.89,<br>90.00 | 90.00,<br>115.88,<br>90.00 | 90.00,<br>115.86,<br>90.00 | 90.00,<br>104.28,<br>90.00 | 90.00,<br>104.42,<br>90.00 | 90.00,<br>112.44,<br>90.00 | 90.00,<br>112.54,<br>90.00 | 90.00,<br>112.54,<br>90.00 |
| Mosaicity (°)                 | 0.08                       | 0.10                       | 0.14                       | 0.08                       | 0.12                       | 0.13                       | 0.15                       | 0.10                       | 0.06                       |
| Resolution range (Å)          | 38.87-1.00<br>(1.02-1.00)  | 39.47-1.15<br>(1.17-1.15)  | 35.21-1.20<br>(1.22-1.20)  | 35.16-1.10<br>(1.12-1.10)  | 40.35-1.50<br>(1.53-1.50)  | 37.34-1.45<br>(1.47-1.45)  | 38.45-1.33<br>(1.36-1.33)  | 38.52-1.20<br>(1.22-1.20)  | 38.57-1.02<br>(1.04-1.02)  |
| Total no. of observations     | 1035459<br>(45149)         | 280457<br>(12317)          | 254082<br>(11584)          | 302439<br>(13882)          | 323496<br>(14785)          | 360375<br>(16343)          | 547538<br>(28370)          | 725100<br>(36449)          | 1238270<br>(51309)         |
| No. of unique observations    | 218349<br>(10505)          | 74206<br>(3528)            | 66132<br>(3293)            | 82868<br>(3983)            | 58834<br>(2890)            | 65010<br>(3157)            | 89288<br>(4619)            | 123914<br>(6174)           | 201545<br>(10211)          |
| Completeness (%)              | 98.1(95.6)                 | 97.4 (94.3)                | 98.3 (95.8)                | 95.7 (93.4)                | 98.9 (99.2)                | 98.4 (97.5)                | 97.3 (95.8)                | 99.2 (97.5)                | 99.4 (98.5)                |
| Multiplicity                  | 4.7 (4.3)                  | 3.8 (3.5)                  | 3.8 (3.5)                  | 3.6 (3.5)                  | 5.5 (5.1)                  | 5.5 (5.2)                  | 6.1 (6.1)                  | 5.9 (5.9)                  | 6.1 (5.0)                  |
| $\langle I/\sigma(I) \rangle$ | 9.3 (0.5)                  | 12.0 (0.9)                 | 7.3 (1.1)                  | 11.8 (1.0)                 | 9.5 (0.9)                  | 10.1 (1.0)                 | 13.3 (0.8)                 | 9.8 (1.0)                  | 12.5 (0.9)                 |
| CC <sub>1/2</sub>             | 0.999<br>(0.262)           | 0.999<br>(0.366)           | 0.997<br>(0.334)           | 0.998<br>(0.334)           | 0.999<br>(0.404)           | 0.999<br>(0.427)           | 0.999<br>(0.325)           | 0.999<br>(0.435)           | 0.999<br>(0.350)           |
| R <sub>meas</sub>             | 0.063<br>(2.850)           | 0.052<br>(1.720)           | 0.078<br>(2.243)           | 0.057<br>(1.839)           | 0.107<br>(2.150)           | 0.097<br>(1.822)           | 0.067<br>(2.504)           | 0.096<br>(1.921)           | 0.071<br>(1.944)           |

**Table S2. Crystallographic data statistics for XFEL datasets**

| Sample                            | G150T apo XFEL         | G150T 30s XFEL         |
|-----------------------------------|------------------------|------------------------|
| Diffraction source                | LCLS MFX               | LCLS MFX               |
| Wavelength (Å)                    | 1.029                  | 1.029                  |
| Temperature (K)                   | 298                    | 298                    |
| Detector                          | Rayonix MX340-XFEL     | Rayonix MX340-XFEL     |
| Space group                       | C2                     | C2                     |
| a, b, c (Å)                       | 72.13, 59.85, 56.14    | 72.14, 59.76, 56.11    |
| $\alpha$ , $\beta$ , $\gamma$ (°) | 90.00, 115.89, 90.00   | 90.00, 115.88, 90.00   |
| Resolution range (Å)              | 22.00-1.30 (1.32-1.30) | 21.98-1.30 (1.32-1.30) |
| Total number of indexed images    | 20796                  | 20372                  |
| Total no. of observations         | 2857813 (42449)        | 2134593 (43514)        |
| No. of unique observations        | 52766 (2562)           | 52683 (2580)           |
| Completeness (%)                  | 99.97 (100.0)          | 99.97 (100.0)          |
| Multiplicity                      | 54.11 (16.43)          | 40.51 (16.85)          |
| $\langle I/\sigma(I) \rangle$     | 5.00 (1.32)            | 4.70 (1.30)            |
| CC <sub>1/2</sub>                 | 0.986 (0.428)          | 0.970 (0.527)          |
| R <sub>split</sub>                | 0.133 (0.625)          | 0.163 (0.636)          |

**Table S3. Crystallographic refinement statistics**

| Sample                                                   | G150T XFEL Free     | G150T XFEL 30s         | G150T cryo             | G150T-1 RT             | G150T-2 RT             | G150T-3 RT              | WT ICH pH 4.2          | WT ICH pH 5.0          | WT ICH pH 5.4          | WT ICH pH 6.0          | WT ICH pH 8.3          |
|----------------------------------------------------------|---------------------|------------------------|------------------------|------------------------|------------------------|-------------------------|------------------------|------------------------|------------------------|------------------------|------------------------|
| PDB code                                                 | 8VPW                | 8VQ1                   | 8TSX                   | 8TSU                   | 8TSY                   | 8TSZ                    | 8TT0                   | 8TT1                   | 8TT2                   | 8TT4                   | 8TT5                   |
| Temperature (K)                                          | 298                 | 298                    | 100                    | 274                    | 274                    | 274                     | 100                    | 100                    | 100                    | 100                    | 100                    |
| Refinement program                                       | PHENIX 1.19.2-4158  | PHENIX 1.19.2-4158     | PHENIX 1.19.2-4158     | PHENIX 1.19.2-4158     | PHENIX 1.19.2-4158     | PHENIX 1.19.2-4158      | PHENIX 1.19.2-4158     | PHENIX 1.19.2-4158     | PHENIX 1.19.2-4158     | PHENIX 1.19.2-4158     | PHENIX 1.19.2-4158     |
| Resolution range (Å)                                     | 22-1.30 (1.33-1.30) | 21.98-1.30 (1.33-1.30) | 38.87-1.00 (1.01-1.00) | 35.25-1.15 (1.17-1.15) | 35.21-1.20 (1.22-1.20) | 35.16- 1.10 (1.12-1.10) | 40.35-1.50 (1.52-1.50) | 32.78-1.45 (1.47-1.45) | 38.45-1.33 (1.35-1.33) | 38.52-1.20 (1.22-1.20) | 38.01-1.02 (1.03-1.02) |
| Completeness (%)                                         | 99.95 (100)         | 99.98 (100)            | 95.92 (59)             | 96.82 (88)             | 98.13 (95)             | 95.42 (93)              | 98.62 (98)             | 98.07 (96)             | 96.98 (94)             | 99.19 (97)             | 98.69 (82)             |
| No. of reflections                                       | 52778 (3609)        | 52672 (3573)           | 213316 (4309)          | 73920 (2347)           | 66082 (2474)           | 82841 (2642)            | 58739 (2606)           | 64920 (2569)           | 89186 (2734)           | 123860 (3786)          | 200123 (5317)          |
| No. of reflections, test set                             | 1997 (142)          | 2000 (141)             | 5143 (101)             | 3801 (114)             | 3331 (132)             | 4122 (144)              | 2905 (121)             | 3233 (152)             | 4336 (138)             | 6020 (214)             | 9758 (290)             |
| R <sub>work</sub>                                        | 0.1280 (0.2350)     | 0.1370 (0.2612)        | 0.1417 (0.3557)        | 0.1196 (0.3113)        | 0.1175 (0.2914)        | 0.1161 (0.2732)         | 0.1684 (0.3211)        | 0.1556 (0.3060)        | 0.1457 (0.3765)        | 0.1288 (0.2911)        | 0.1216 (0.2939)        |
| R <sub>free</sub>                                        | 0.1520 (0.2887)     | 0.1713 (0.3089)        | 0.1679 (0.4055)        | 0.1405 (0.2862)        | 0.1371 (0.3104)        | 0.1338 (0.2629)         | 0.1960 (0.3421)        | 0.1818 (0.3441)        | 0.1763 (0.3838)        | 0.1581 (0.2891)        | 0.1377 (0.3035)        |
| No. of non-H atoms                                       |                     |                        |                        |                        |                        |                         |                        |                        |                        |                        |                        |
| Protein                                                  | 1987                | 1963                   | 4116                   | 2002                   | 2002                   | 2002                    | 3642                   | 3567                   | 4280                   | 4518                   | 4180                   |
| Water                                                    | 153                 | 154                    | 447                    | 178                    | 178                    | 181                     | 407                    | 373                    | 433                    | 537                    | 538                    |
| Heteroatom                                               | 1                   | 12                     | 5                      | 1                      | 1                      | 1                       | 0                      | 0                      | 16                     | 28                     | 28                     |
| Total                                                    | 2141                | 2129                   | 4568                   | 2181                   | 2181                   | 2184                    | 4049                   | 3940                   | 4729                   | 5083                   | 4746                   |
| Average R.M.S. deviations                                |                     |                        |                        |                        |                        |                         |                        |                        |                        |                        |                        |
| Bonds (Å)                                                | 0.007               | 0.005                  | 0.007                  | 0.007                  | 0.010                  | 0.008                   | 0.007                  | 0.005                  | 0.005                  | 0.005                  | 0.008                  |
| Angles (°)                                               | 0.875               | 0.787                  | 0.965                  | 0.880                  | 1.029                  | 0.972                   | 0.771                  | 0.746                  | 0.856                  | 0.890                  | 1.020                  |
| Average B factors (<B <sub>iso</sub> >, Å <sup>2</sup> ) |                     |                        |                        |                        |                        |                         |                        |                        |                        |                        |                        |
| Protein                                                  | 16.67               | 18.72                  | 15.34                  | 17.90                  | 18.24                  | 16.57                   | 22.40                  | 21.09                  | 20.89                  | 14.83                  | 12.67                  |
| Water                                                    | 36.54               | 39.86                  | 32.98                  | 37.05                  | 36.83                  | 33.67                   | 30.43                  | 34.29                  | 37.08                  | 32.15                  | 27.33                  |
| Average ADP anisotropy <sup>1</sup>                      |                     |                        |                        |                        |                        |                         |                        |                        |                        |                        |                        |
| Protein                                                  | 0.498               | 0.493                  | 0.442                  | 0.430                  | 0.487                  | 0.494                   | 0.561*                 | 0.551*                 | 0.396                  | 0.403                  | 0.458                  |
| Water                                                    | 0.387               | 0.366                  | 0.394                  | 0.357                  | 0.413                  | 0.404                   | 1.000                  | 0.390*                 | 0.394                  | 0.366                  | 0.394                  |
| MolProbity clashscore <sup>2</sup>                       | 2.48                | 2.25                   | 3.95                   | 1.97                   | 1.72                   | 1.48                    | 1.76                   | 1.11                   | 4.49                   | 2.72                   | 1.76                   |
| Ramachandran plot                                        |                     |                        |                        |                        |                        |                         |                        |                        |                        |                        |                        |
| Outliers (%)                                             | 0.00                | 0.00                   | 0.00                   | 0.00                   | 0.00                   | 0.00                    | 0.00                   | 0.00                   | 0.00                   | 0.44                   | 0.44                   |
| Allowed (%)                                              | 0.89                | 0.89                   | 0.89                   | 0.89                   | 0.89                   | 0.45                    | 0.89                   | 0.88                   | 1.33                   | 1.11                   | 1.11                   |
| Favored (%)                                              | 99.11               | 99.11                  | 99.11                  | 99.11                  | 99.11                  | 99.55                   | 99.11                  | 99.12                  | 98.67                  | 98.45                  | 98.45                  |

<sup>1</sup>Anisotropy is defined as the ratio of the smallest to largest eigenvalue of the ADP tensor.

<sup>2</sup>Defined as the number of close contacts (atom overlap > 0.4 Å) per 1000 atoms.
